# Supplementary material for: Technology and Information Sharing in Disaster Relief
Source: PubMed Central journal article supplement (PMC5008756; doi:10.1371/journal.pone.0161783), 2016-09-01
Supplement: pone.0161783.s001.pdf [file pone.0161783.s001.pdf]

| Comments categories                                                                                                                                                                                                                           | Number of comments | Share of comments (%) |
|-----------------------------------------------------------------------------------------------------------------------------------------------------------------------------------------------------------------------------------------------|--------------------|-----------------------|
| <b>1. Situation Reports:</b> General collected information (overview) about the event (location, number of people affected, magnitude, logistics). Often by UNOCHA or state officials but not always. (Links and Attachments mark separately) |                    |                       |
| <b>S1. UNOCHA or any other UN agencies.</b>                                                                                                                                                                                                   | 1,811              | 15.69                 |
| <b>S2. Other (Other IGO, NGO or domestic government agencies)</b>                                                                                                                                                                             | 1,245              | 10.78                 |
| <b>2. Team Features:</b> Comments containing information about the status of teams.                                                                                                                                                           |                    |                       |
| <b>T1. Stand-Down:</b> No activity or involvement                                                                                                                                                                                             | 102                | 0.88                  |
| <b>T2. Monitoring:</b> Monitoring the situation                                                                                                                                                                                               | 1,069              | 9.26                  |
| <b>T3. Standby:</b> Available to deploy when needed.                                                                                                                                                                                          | 513                | 4.44                  |
| <b>T4. Mobilizing:</b> Mobilizing to deploy.                                                                                                                                                                                                  | 54                 | 0.47                  |
| <b>T5. Deployed:</b> On route or on mission.                                                                                                                                                                                                  | 1,539              | 13.33                 |
| <b>T6. Mission Completed:</b> Mission is finished.                                                                                                                                                                                            | 183                | 1.59                  |
| <b>3. Items:</b> Comments containing information about the status of items (non-human resources, e.g. tents, blankets, food, money, etc.)                                                                                                     |                    |                       |
| <b>I1. Considered (standby):</b> Items being considered or that are available to be sent if needed.                                                                                                                                           | 117                | 1.01                  |
| <b>I2. Dispatching:</b> Items that have been sent.                                                                                                                                                                                            | 425                | 3.68                  |
| <b>I3. Delivered:</b> Items that have been delivered.                                                                                                                                                                                         | 206                | 1.78                  |
| <b>I4. Canceled:</b> Items that will no longer be sent.                                                                                                                                                                                       | 2                  | 0.02                  |
| <b>4. Needs/Requests:</b> Comments containing a request for resources, either from the affected state or the relief workers (i.e. VO users).                                                                                                  |                    |                       |
| <b>R1. Resource:</b> A request for teams, equipment, funds, etc. usually by the affected state but also from relief workers.                                                                                                                  | 289                | 2.50                  |
| <b>R2. Information:</b> A request for information, usually by the relief workers but can also be from the affected states. This also includes answers to enquires.                                                                            | 455                | 3.94                  |
| <b>R3. Replies</b> to requests for resources or information.                                                                                                                                                                                  | 406                | 3.53                  |
| <b>5. Maps:</b> Comments containing a link or attachment to a map.                                                                                                                                                                            | 73                 | 0.63                  |
| <b>6. Attachments:</b> Comments referring to attachments.                                                                                                                                                                                     | 2,346              | 20.32                 |
| <b>7. Links:</b> Anytime a hyperlink is included in a comment. Twitter # also                                                                                                                                                                 | 625                | 5.41                  |
| <b>8. Field Coordination:</b> Comments containing information about meetings or field stations. This also includes comments with contact information for responders working in the field.                                                     | 1,906              | 16.51                 |
| <b>9. Results:</b> Comments containing information on outcomes or accomplishments in the field. (This also includes Updates and or general status).                                                                                           | 845                | 7.32                  |
| <b>10. Media:</b> Comments containing summaries or re-posts of media reports or news articles. Includes social media.                                                                                                                         |                    |                       |
| <b>M1. UNOCHA</b> posting information derived or directly from news or social media                                                                                                                                                           | 293                | 2.54                  |
| <b>M2. Other entities</b> (Other IGO, NGO or domestic government agencies) posting information derived or directly from news or social media.                                                                                                 | 522                | 4.52                  |
| <b>Total number of comments</b>                                                                                                                                                                                                               | 11,544             | 100                   |
